# Supplementary material for: Observed Trends of Clouds and Precipitation (1983–2009): Implications for Their Cause(s)
Source: Copernicus journal article supplement (doi:10.5194/acp-2020-577), 2020-08-21
Supplement: Supplementary file 1 [file acp-2020-577-supplement.pdf]

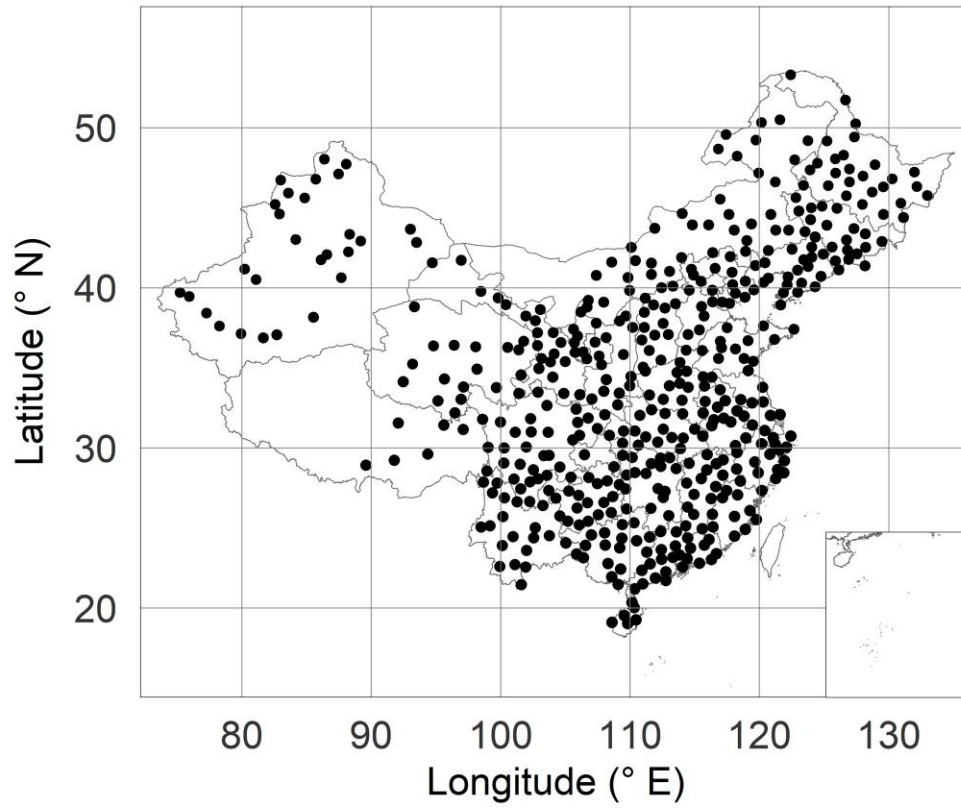

Figure S1. Spatial distribution of 477 stations used in this study.

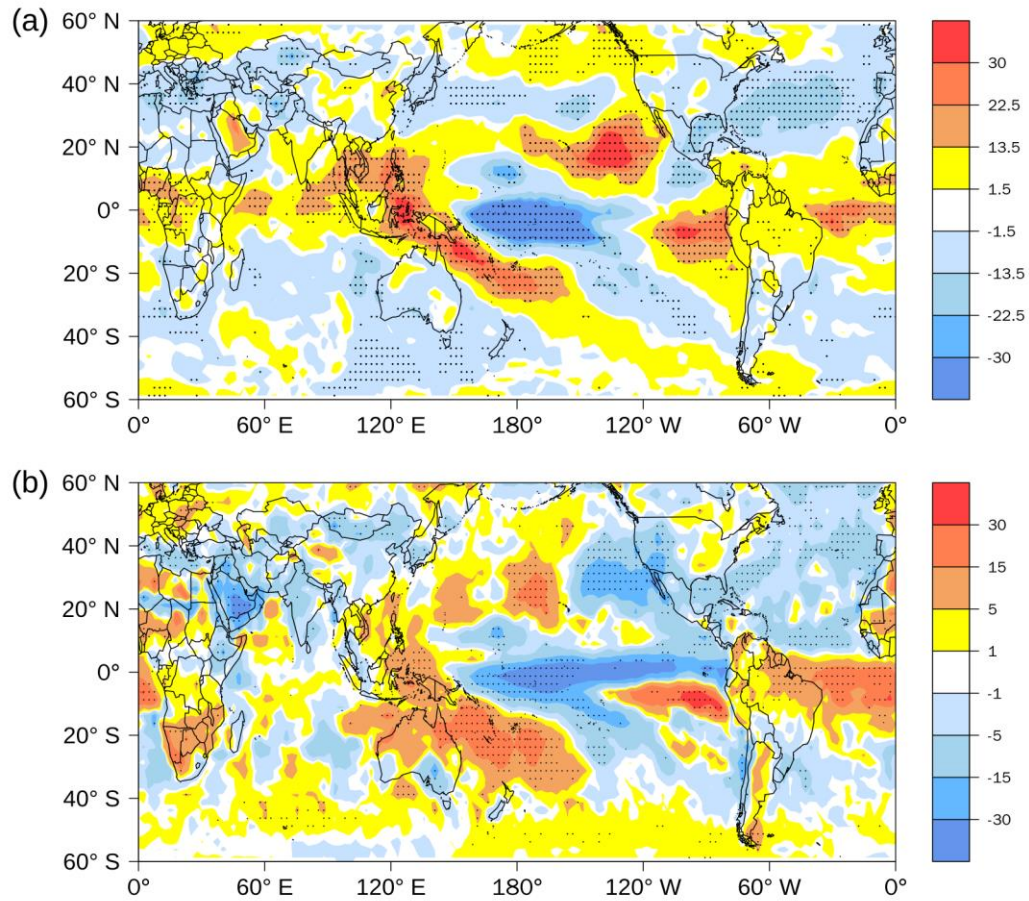

**Figure S2. (a) Slope of linear regression between total cloud cover and -PDO (units: % std<sup>-1</sup>) at individual grids from corrected ISCCP D2 data set (1983–2009). (b) Slope of linear regression between annual total precipitation and -PDO (units: % std<sup>-1</sup>) at individual grids from GPCP pentad V2.2 (1983–2009). Dots indicate changes significant at the 95% confidence level.**

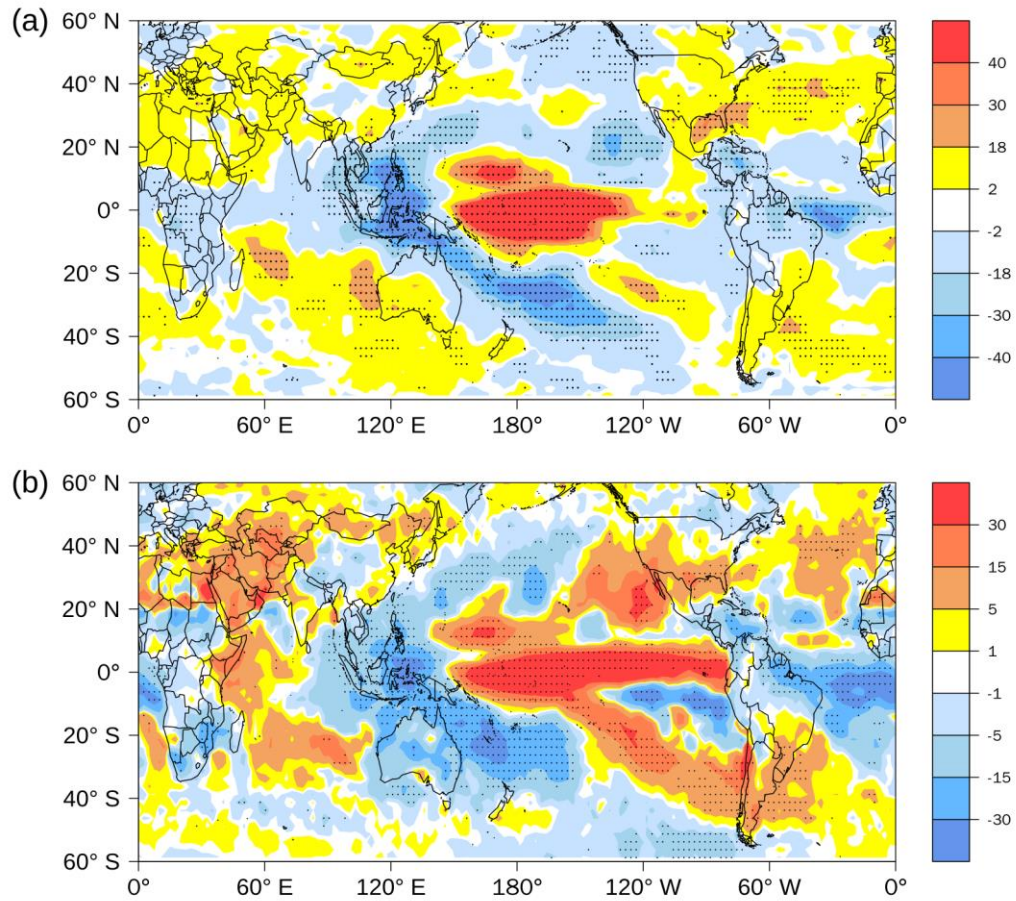

**Figure S3. (a) Slope of linear regression between total cloud cover and Niño3.4 (units: % K<sup>-1</sup>) at individual grids from corrected ISCCP D2 data set (1983–2009). (b) Slope of linear regression between annual total precipitation and Niño3.4 (units: % K<sup>-1</sup>) at individual grids from GPCP pentad V2.2 (1983–2009). Dots indicate changes significant at the 95% confidence level.**
